# Supplementary figures and images for: Red Si–rhodamine drug conjugates enable imaging in GFP cells
Source: Royal Society of Chemistry journal article supplement (doi:10.1039/c4cc00144c), 2014-01-01

### SiR-Me (4)

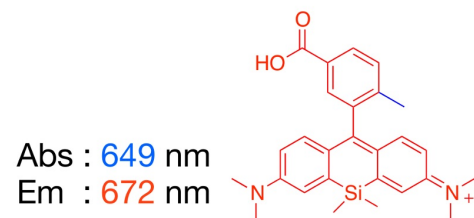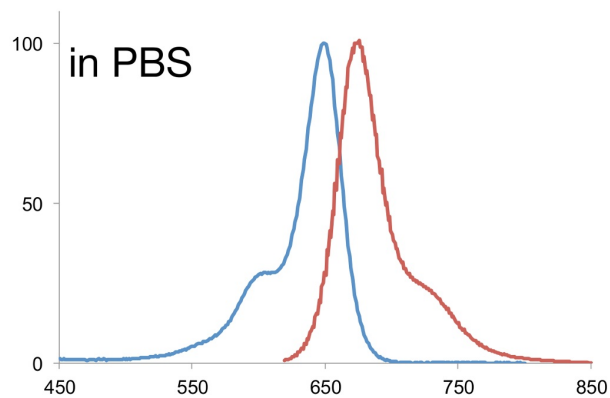

### SiR-COOH (9)

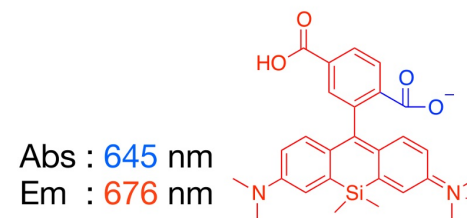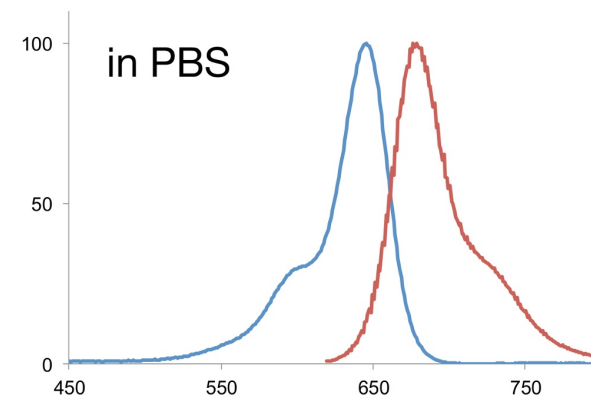

### Olaparib-SiR-Me (6)

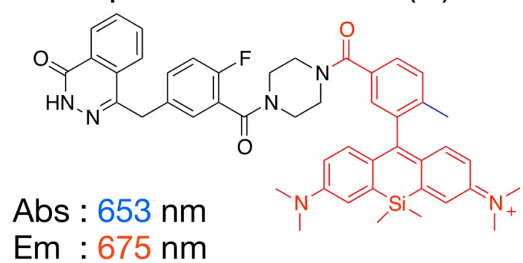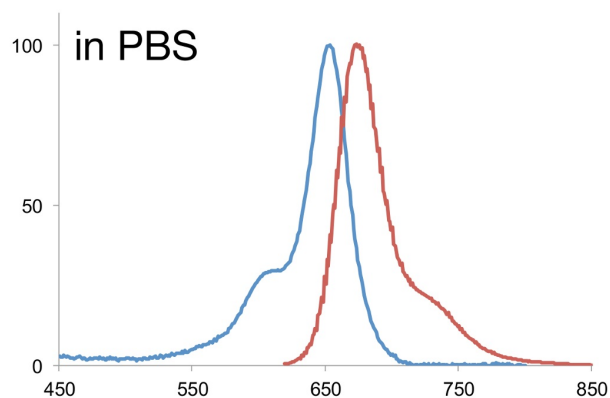

### Olaparib-SiR-COOH (10)

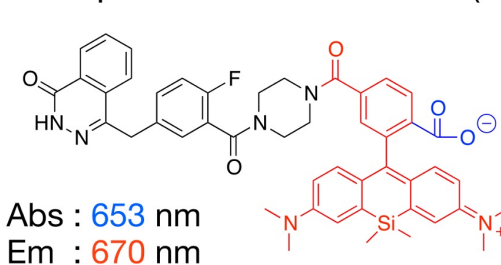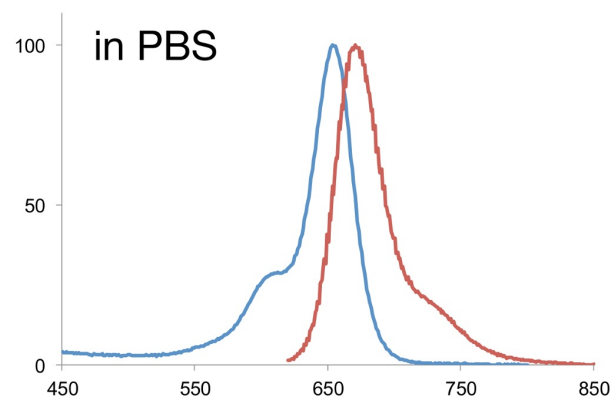

### Olaparib-spacer-SiR-COOH (14)

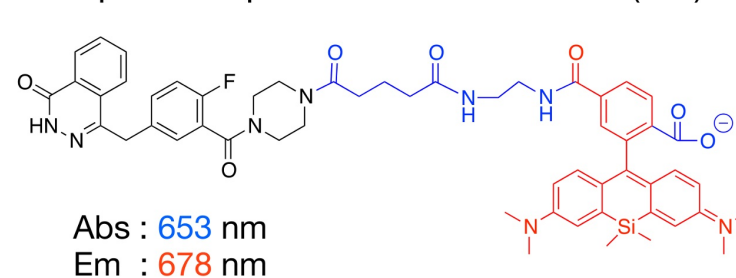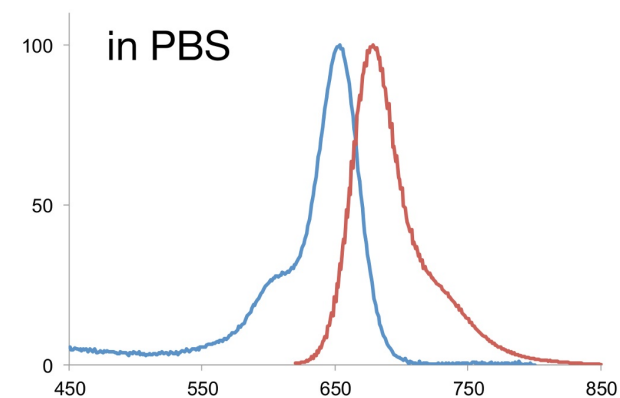

Supplement: c4cc00144c1.pdf [file c4cc00144c1.pdf]

H2B-GFP  
+ Mitotracker-Green

SiR

Merge

compound 4

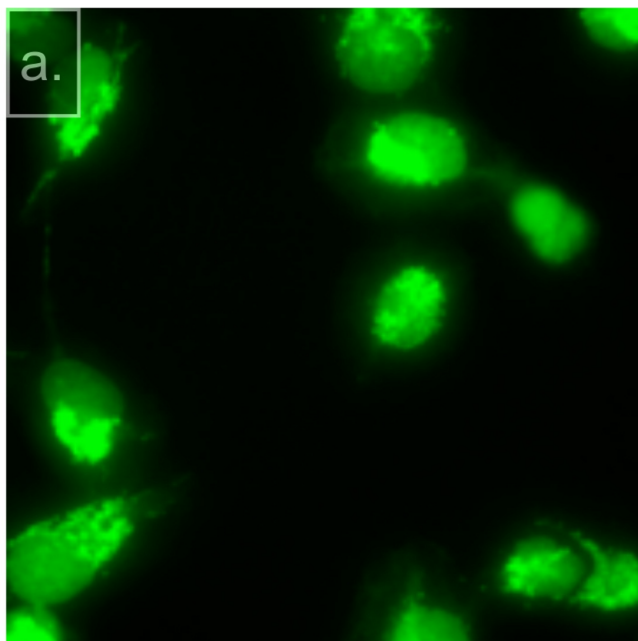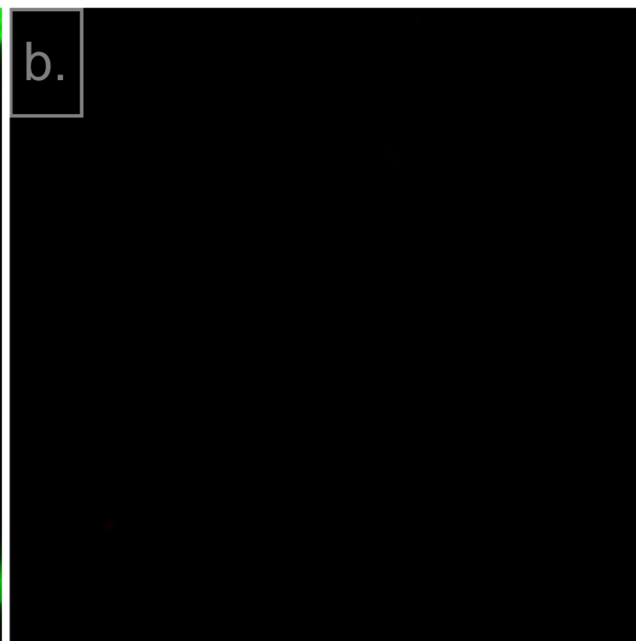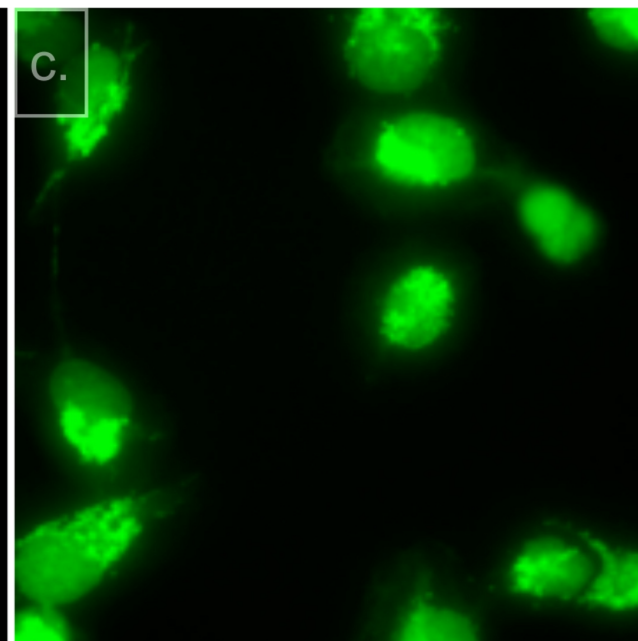

compound 6

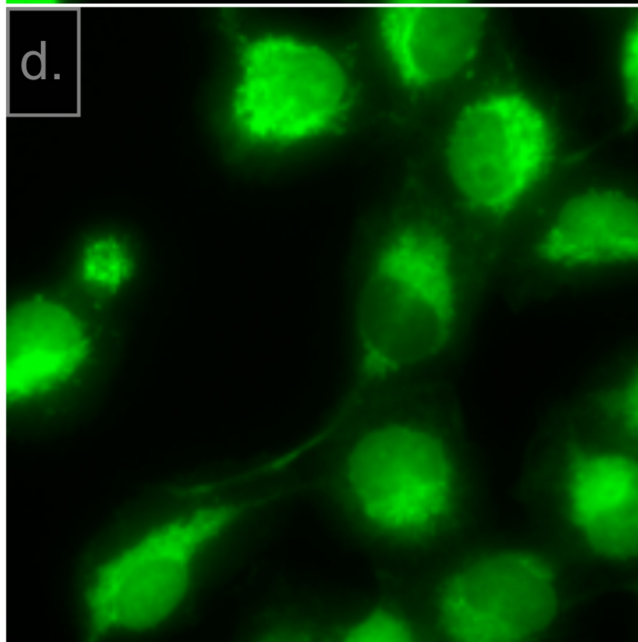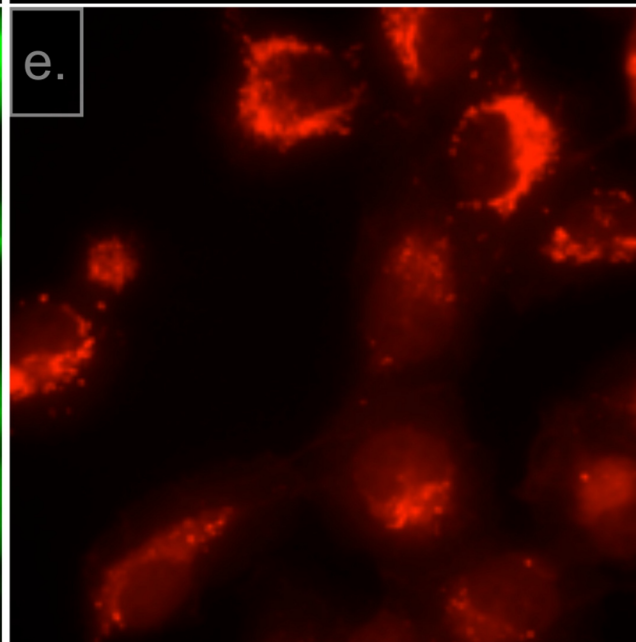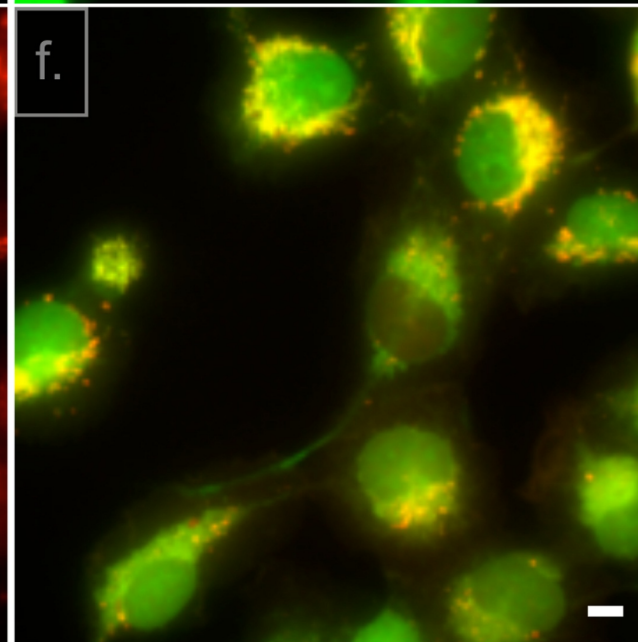

Supplement: c4cc00144c3.pdf [file c4cc00144c3.pdf]

HT1080 (H2B-GFP)

OVCA429 (Cytochrome C Oxidase - GFP)

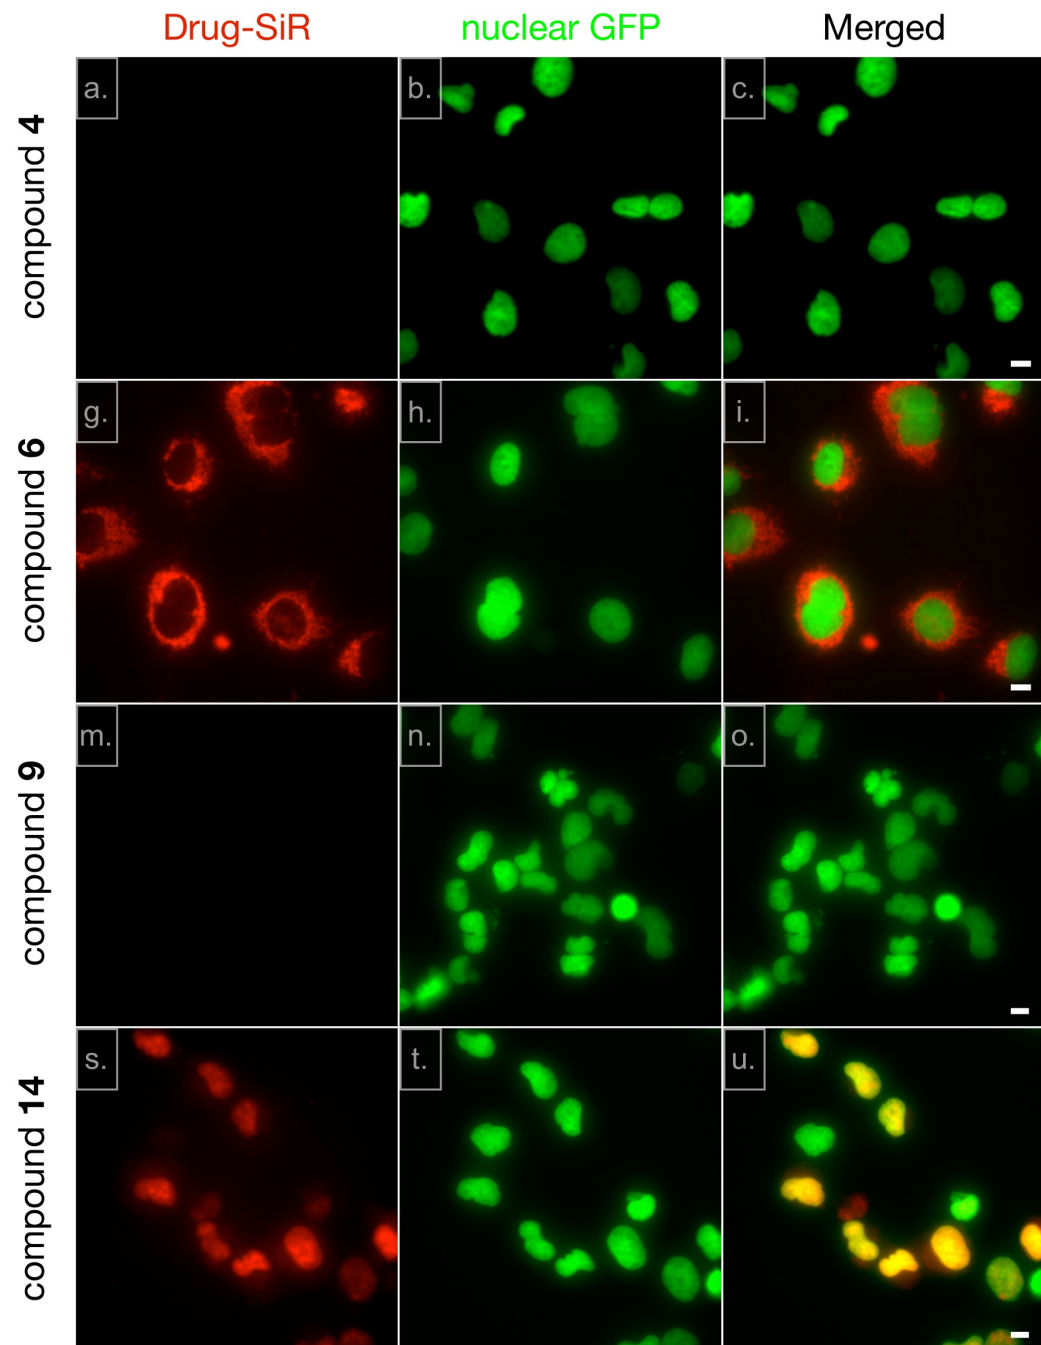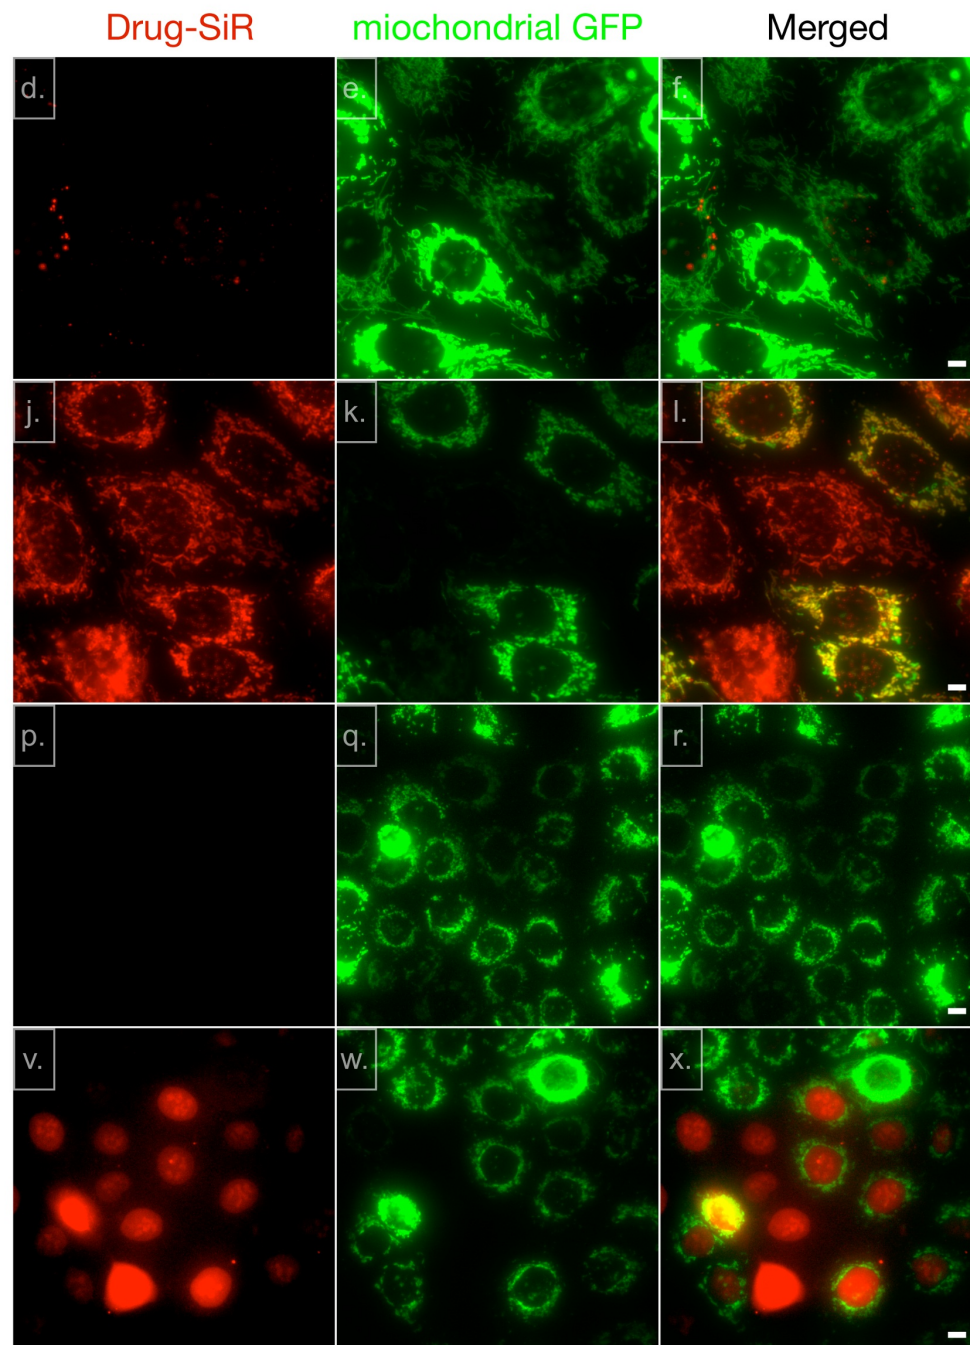

Supplement: c4cc00144c4.pdf [file c4cc00144c4.pdf]

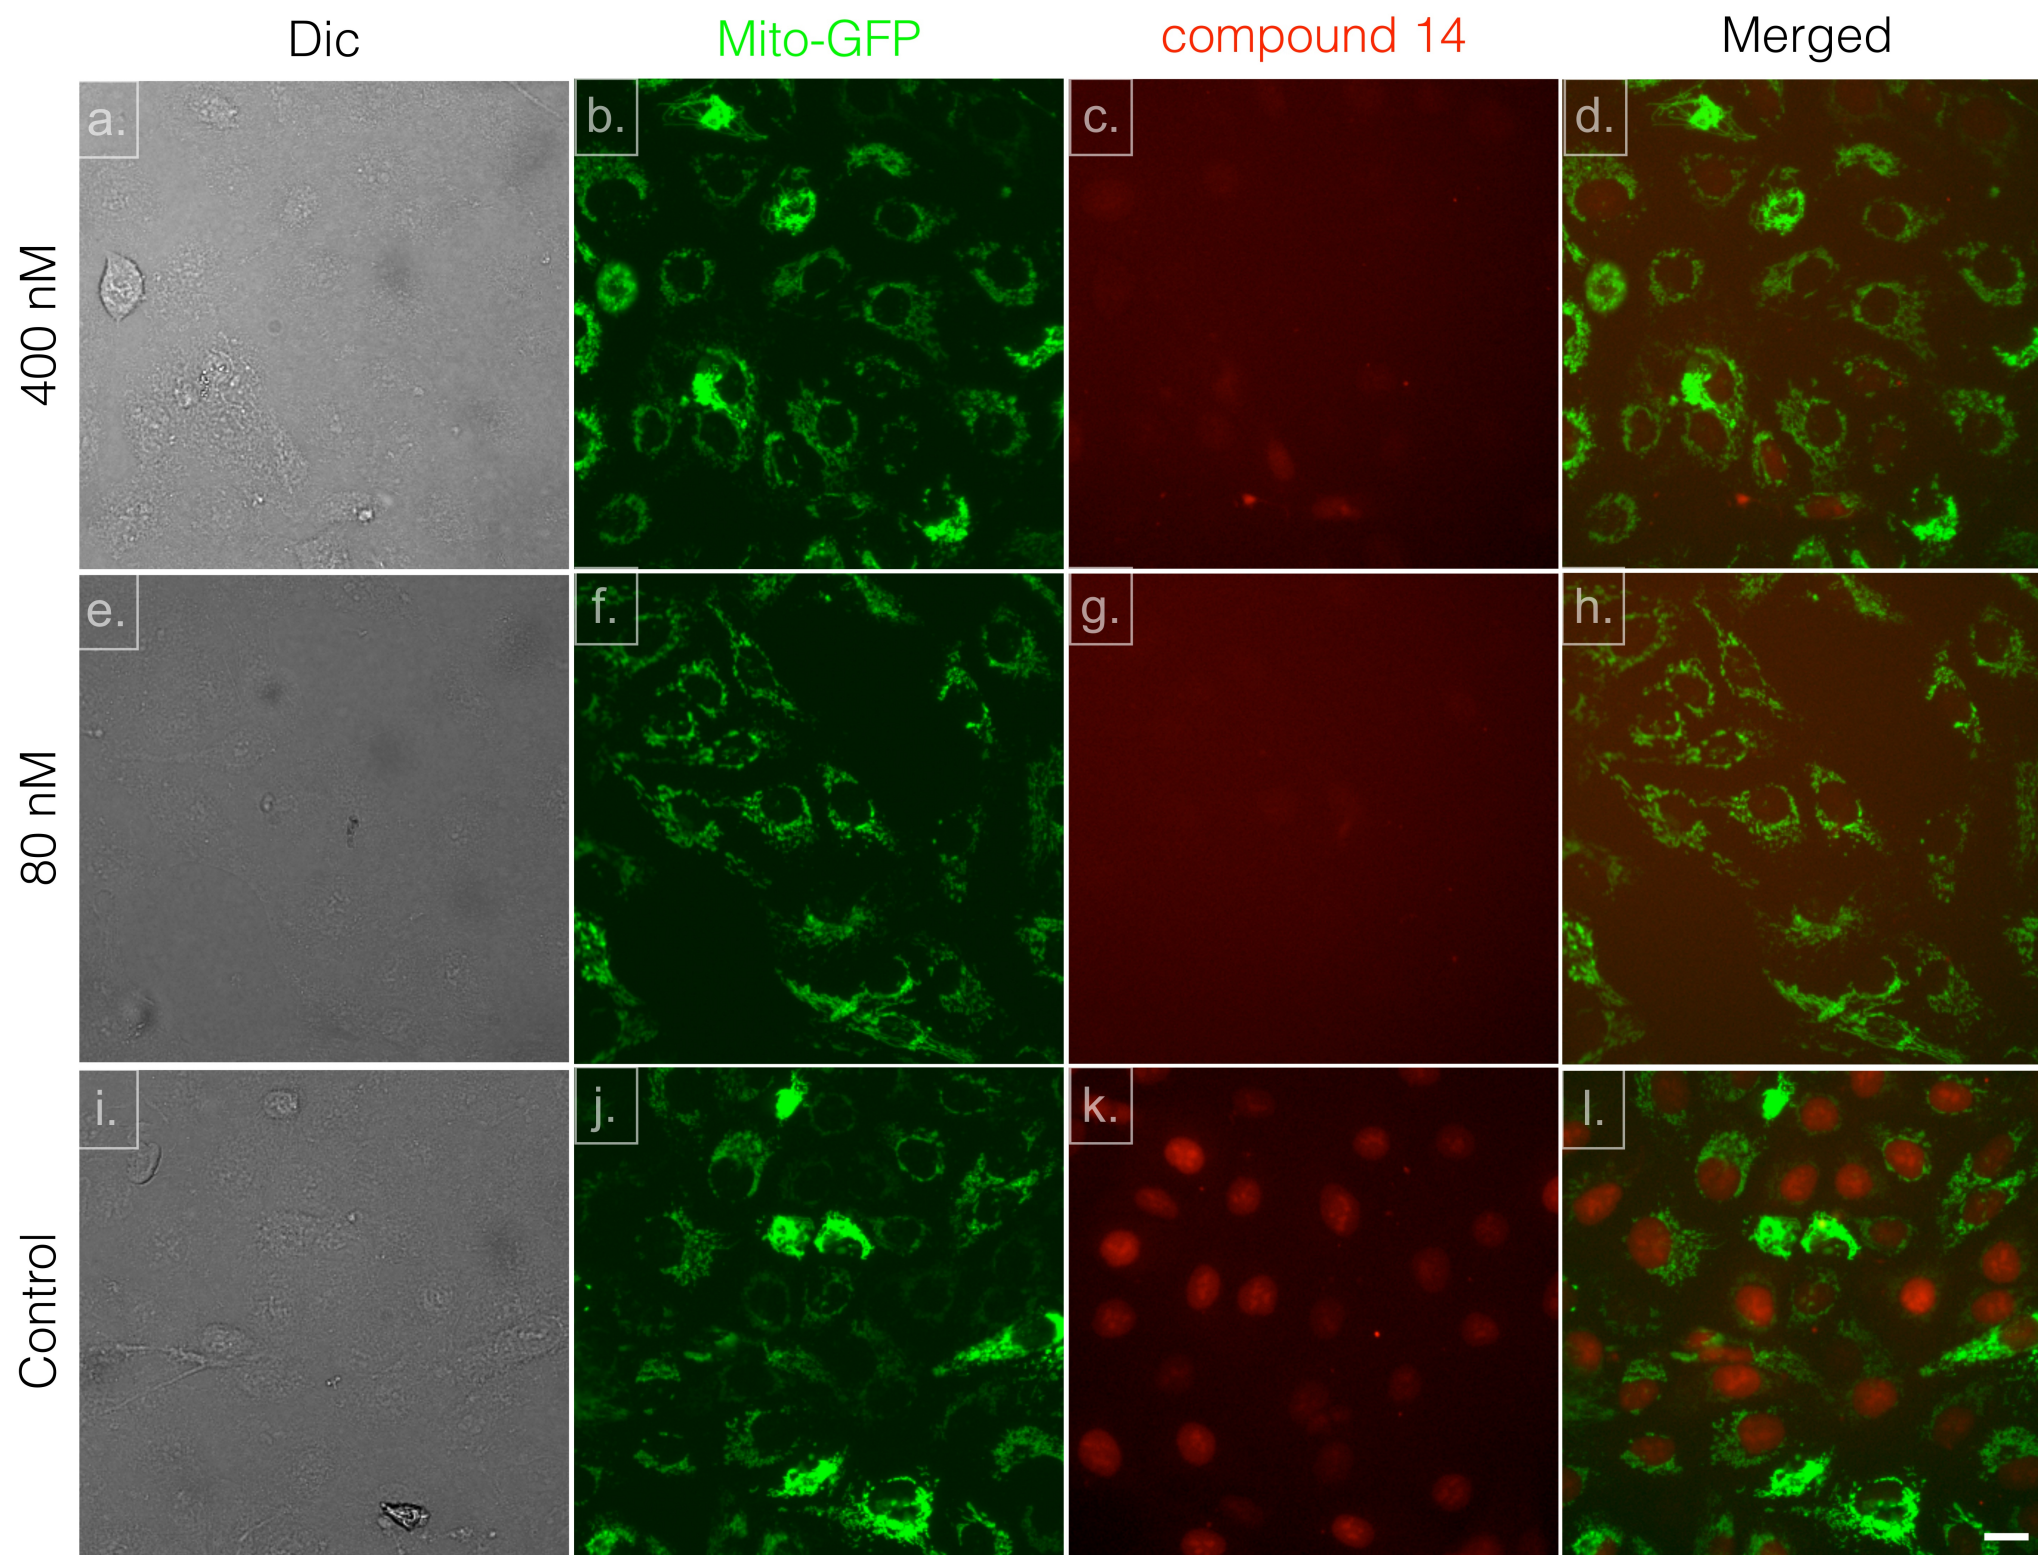

Supplement: c4cc00144c5.pdf [file c4cc00144c5.pdf]
